# Supplementary material for: Traumatic Bladder Ruptures: A Ten-Year Review at a Level 1 Trauma Center
Source: Adv Urol. 2019 Dec 12;2019:2614586. doi: 10.1155/2019/2614586 (PMC6930775; doi:10.1155/2019/2614586)
Supplement: Supplementary Materials — The supplementary data file is a table which has all of the demographic and clinical data for bladder trauma patients listed in a deidentified manner. Demographic data include age, gender, ethnicity, and BMI. The clinical variables include date and time of initial injury, mechanism of injury, concomitant injuries, and imaging studies. Additional data regarding length of catheterization, complications, and follow-up studies are also included. [file 2614586.f1.xls]

## Sheet: Sheet1
Age	Gender	Race	BMI	Arrival Date	Arrival Time	Mech of injury	Injury type	Op vs Non-Op	Addnl solid organ injuries	Pelvic Fx	Gross Hematuria	U/A obtained on admission (Y/N)	U/A results	Service performing repair	Time of repair	Time from injury to repair (hrs)	Location of injury	Size of repair (cm)	# of layers	Suture type	Running vs interrupted	Transfusion of blood products	Foley in ED	Drain (not including foley)	Op time (hrs)	Were Post Op Abx given (Y/S)	Post Op Abx Type/Regimen	JP Cr	Initial cysto imaging modality	Time to 1st cystogram (hrs)	Leak present at first fluoro	Time to normal fluoro from admission (d)	Length of catheterization from placement to removal (d)	Complications - UTI, blood clot, retention
																																		No trauma found in epic for this patient - wonder if it was too far back?
66	M	White		2008-06-26	1899-12-31 20:36:00	Fall	EP	Non-Op	Subarachnoid hemorrhage, subdural hemorrhage	Yes	No	No											Yes						CT C/A/P with IV contrast	0.85	No	7	7	No extravasation at WVU but apparently was at UHC prior to admission. Treated as if potential extravasation and potential EP rupture with 1 week of Foley. Repeat CT 1 week later still normal
15	M	White	21.57	2008-09-04	1899-12-31 18:58:00	MVC	EP	Non-Op	Kidney laceration; pulmonary contusion; urethral injury	Yes	Yes	No											Yes	SPT					Flurocystogram	4.25	Yes	Never obtained	Unknown	Urethral injury resulted in foley in ED only going as far the prostatic urethra. Pt needed SPT; pseudomonal UTI
25	F	White		2008-10-23	1899-12-31 20:38:00	MVC	EP	Non-Op	Bilateral frontoparietal subdural hematomas; pneumothorax; splenic laceration	Yes	Yes	No											Yes						CT C/A/P with IV contrast	1.53	Yes	N/A	N/A	Blood clots in foley during SICU stay (resolved with flushing by Urology); Patient passed away 2 days later from trauma-related injuries
87	F	White		2008-11-25	1899-12-31 17:20:00	Fall	IP	Non-Op	None	Yes	Yes	No											Yes						CT abdo/pelvis	0.57	Yes	Never obtained	Unknown	Blood clots in foley during SICU stay (resolved with flushing by Urology)
69	M	White	26.7	2009-04-07	1899-12-31 12:59:00	MVC	EP	Non-Op	Testicular injury; anterior diaphragmatic hernia	Yes	Yes	Yes	> 100 RBCs + 50-100 WBCs										Yes	Bilateral JP drains, bilateral nephrostomy tubes				Yes	CT C/A/P with IV contrast	1.33	Yes	38	38	Continuous urine leak identified by JP creatinine resulted in placement of bilateral nephrostomy tubes during hospitilization that were both discontinued prior to discharge.
16	F	White	32	2009-04-25	1899-12-31 05:07:00	MVC	EP	Non-Op	Subdural hematoma with stroke; pneumothorax; splenic laceration	Yes	Yes	Yes	> 100 RBCs										Yes	10 flat JP drain				Yes	CT C/A/P with IV contrast	1.8	Yes	19	19	Not clear in OR where EP leak was coming from so no repair was done during surgery
37	M	White	29.63	2009-07-07	1899-12-31 02:45:00	MVC	EP	Op	Grade 1 spleen laceration	Yes	Yes	Yes	182 RBCs + 100 WBCs	Urology	2009-07-07 03:20:00	0.58	Anterior bladder near bladder neck	Not specified	2	Vicryl	Running	No	Yes	10 flat JP drain, SPT	3	No		Yes	Flurocystogram	2.38	Yes	42	43	Multiple UTIs + 1 case of pyelonephritis while catheters in place
36	M	Hispanic	24.59	2009-07-23	1899-12-31 21:30:00	Fall	EP	Non-Op	Pneumothorax	Yes	No	Yes	18 RBCs										Yes						Flurocystogram	12.57hrs	Yes	14	14	None
60	F	White	18.56	2009-10-19	1899-12-31 05:30:00	Pedestrian struck by MV	EP	Op	None	Yes	Yes	Yes	> 182 RBCs	Urology	2009-10-19 11:41:00	6.18	Anterior bladder near bladder neck	4	2	Vicryl	Running	No	Yes	No	2.58	Yes	4 doses of IV Ceftriaxone - 2 mg IV Q24 and 2 doses of IV Cefazolin - 1 mg IV Q8	No	CT chest abdomen pelvis with IV contrast	2.17hrs	Yes	8	8	Rocephin was for concurrent pneumonia obtained during hospital admission
40	M	White	29.76	2010-02-11	1899-12-31 17:45:00	Crush injury	IP	Op	None	Yes	Yes	Yes	> 182 RBCs	Urology	2010-02-11 18:30:00	0.75	Anterior bladder wall	1.5	2	Vicryl	Running	No	Yes	JP drain	1	Yes	5 doses of IV Cefazolin - 1 mg IV Q8	No	CT C/A/P with IV contrast	1.58	Yes	13	96	Paraplegia due to injuries; urinary retention resulting in need for straight cath 5X/d; multiple UTIs treated with bactrim
50	F			2010-04-11	1899-12-31 05:42:00	MVC	EP	Non-Op	None	Yes	Yes	Yes	24 RBCs										Yes						CT pelvis w/o contrast	2.2	Yes	12	12	None
52	F	White	21.3	2016-08-06	1899-12-31 19:20:00	MVC	EP	Op	None	Yes	Yes	Yes	> 182 RBCs	Urology	2010-08-06 23:20:00	4	Anterior bladder wall	0.04	2	Vicryl	Running	No	Yes	10 Fr Flat JP drain	2.22	Yes	6 doses of IV Cefazolin - 1 mg IV Q8	Yes	CT pelvis w IV contrast	1.35	Yes	Never obtained	11	None
34	M	White	28.54	2010-09-05	1899-12-31 17:10:00	MVC	EP	Non-Op	None	Yes	Yes	No											Yes						CT abdo/pelvis w/ IV contrast	2.12	Yes	29	30	AKI and rhabdomyolysis during SICU stay, resolved by discharge; lower extremity DVT during stay
22	F	White	34.57	2010-09-15	1899-12-31 08:05:00	ATV	IP	Op	None	Yes	Yes	Yes	> 182 RBCs, 22 WBCs, 5 bacteria	Urology	2010-09-15 11:30:00	3.42	Dome to posterior wall	Not specified	1	Vicryl	Both	No	Yes	JP drain	3.58	No		No	CT pelvis w/o contrast	1.18	Yes	Never obtained	Unknown	Lost to F/U
18	M	White	28.1	2010-09-22	1899-12-31 12:15:00	Crush injury	EP	Op	None	Yes	Yes	Yes	> 182 RBCs	Urology	2010-09-23 11:05:00	23.83	Anterior bladder wall	2	1	Vicryl	Interrupted	No	Yes	Hemovac drain over bladder	1.95	Yes	6 doses of IV Cefazolin - 1 mg IV Q8	No	CT C/A/P with IV contrast	2.08	Yes	28	28	None
21	M	White	28.82	2011-08-31	1899-12-31 00:15:00	Crush injury	EP	Non-Op	Posterior urethral injury	Yes	Yes	Yes	> 182 RBCs										Yes	SPT					CT cysto	1.2	Yes	34	34	Urinary retention w/ subsequent placement of SPT - pt had blood clots at bladder neck and posterior urethra; 34 d after trauma pt had to have foley removed under anesthesia due to foley resistence upon attempt to remove and presence of a bladder stone
31	F	White	17.3	2011-09-10	1899-12-31 22:10:00	ATV	EP	Non-Op	Splenic laceration; pneumothorax	Yes	Yes	Yes	> 182 RBCs + 61 WBCs										Yes	No					CT cysto	1.77	Yes	13	13	None
60	F	White	26.77	2011-09-16	1019 PM	Pedestrian struck by MV	EP	Non-Op	None	Yes	Yes	No											Yes	No					CT cysto	1.6	Yes	17	18	None
42	F	Non-Hispanic	23.08	2012-03-04	1899-12-31 16:12:00	Fall	EP	Non-Op	None	No	Yes	No											Yes	No					CT abdo/pelvis at outside facility	Not specified	Yes	Never obtained	Unknown	Lost to F/U
50	M	White	26.97	2012-12-06	Time not specified	MVC	EP	Non-Op	None	Yes	Yes	Yes	149 RBCs																CT C/A/P without contrast	Not specified	Yes	14	14	None
44	F	Non-Hispanic	28.12	2013-01-12	1899-12-31 19:56:00	ATV	IP	Op	None	Yes	Yes	Yes	> 182 RBCs	Urology	1/13/2013 00:09 AM	4.21	Anterior bladder near dome	4	3	Vicryl	Running	No	Yes	JP drain	4.2	Yes	3 doses of IV Cefazolon - 1 mg IV Q8	Yes	CT cysto	1.2	Yes	13	13	None
72	M	White	29.96	2013-08-10	1899-12-31 20:00:00	Fall	EP	Non-Op	Adrenal injury; cardiac contusion; pulmonary contusion	Yes	Yes	Yes	32 RBCs										Yes	No					CT cysto	6.13	Yes	N/A	N/A	Passed away from injuries 7 d after trauma
32	M	Non-Hispanic	25.33	2013-08-20	1899-12-31 21:00:00	Fall	EP	Op	Small bowel perforation; rectal contusion	Yes	Yes	Yes	> 182 RBCs	Urology	2013-08-22 09:00:00	36	Anterior bladder wall	Not specified	Multiple layers (not specified)	Vicryl	Running	No	Yes	No	10.2	Yes	3 doses of IV Cefazolon - 1 mg IV Q8	No	CT cysto	6.4	Yes	34	35	None
31	F	White	18.21	2013-10-16	1899-12-31 00:41:00	Pedestrian struck by MV	IP	Op	Grade 3 renal injury; renal contusion	Yes	Yes	No		Urology	2013-10-16 03:52:00	3.18	Anterior bladder wall + Posterior wall near dome	a) 3 b) 2	2	Vicryl	Running	Yes - 1 unit RBCs	Yes	10 Fr Flat JP drain	8.05	Yes	3 doses of IV Cefazolon - 1 mg IV Q8	Yes	CT cysto	1.43	Yes	27	27	Visited ED 27 d after trauma occured due to hematuria. At time had CT cysto that showed no extravasation of urine, foley was D/C, patient discharged home
30	F	Non-Hispanic	21.77	2013-10-20	1899-12-31 00:06:00	MVC	IP	Op	Uterine laceration; liver laceration; kidney laceration; splenic laceration; pulmonary contusion	Yes	Yes	Yes	> 182 RBCs	Urology	2013-10-20 01:50:00	1.73	Anterior bladder near dome	4	2	Vicryl	Running	No	Yes	10 Fr Flat JP drain	2.03	Yes	5 doses of IV Cefazolin - 1 mg IV Q8	Yes	CT cysto	1.37	Yes	Never obtained	30	None
87	F	White	23.42	2014-03-09	1899-12-31 15:00:00	Fall	EP	Op	No	Yes	Yes	Yes	> 182 RBCs	Urology	2014-03-10 16:57:00	24.95	Anterior bladder near dome	2	2	Vicryl	Both	No	Yes	No	1.28	No		No	CT C/A/P without contrast	6.17	Yes	Never obtained	Unknown	Developed NSTEMI after discharge and was re-admitted into the hospital. Started on warfarin. Developed pelvic hematoma. Following second discharge was supposed to F/U with urology but patient passed away. I can't find a note that states the cause of death
47	M	White	23.6	2014-05-06	1899-12-31 23:25:00	ATV	EP	Non-Op	None	Yes	Yes	Yes	> 182 RBCs										Yes	No					CT cysto	1.4	Yes	29	29	None
39	M	White	24.26	2014-10-03	1899-12-31 13:12:00	ATV	IP	Op	Splenic laceration; Pneumothorax; Subdural hematoma	Yes	Yes	Yes	> 182 RBCs	Trauma Surgery	2014-10-04 13:03:00	23.85	Dome	5	2	Vicryl	Running	No	Yes	No	1.8	Yes	3 doses of IV Cefazolon - 1 mg IV Q8	No	CT cysto	14	Yes	18	18	None
53	M	Non-Hispanic	23.01	2014-10-11	1899-12-31 10:48:00	Unknown mech	IP	Op	None	Yes	Yes	Yes	> 100 RBCs	Urology	2014-10-11 11:21:00	0.55	Dome	5	2	Vicryl	Running	No	Yes	No	3.13	No		No	No bladder imaging obtained		N/A	12	12	None
38	M	Non-Hispanic	27.59	2014-10-11	1899-12-31 12:43:00	Fall	EP	Op	None	Yes	Yes	Yes	53 RBCs	Urology	2014-10-11 15:55:00	3.13	Anterior bladder wall	2	2	Vicryl	Running	No	Yes	No	1.4	Yes	5 doses of IV Cefazolin - 1 mg IV	No	CT cysto	0.7	Yes	12	12	None
26	M	White	20.62	2015-02-28	1899-12-31 07:10:00	MVC	IP	Op	Kidney laceration; serosal injury to sigmoid colon; hematoma of transverse colon	Yes	Yes	Yes	> 182 RBCs	Urology	2015-02-28 09:40:00	2.5	Dome	1	2	Vicryl	Running	No	Yes	No	8.73	Yes	2 doses of IV Cefazolin - 2 mg IV	No	CT cysto	1.55	Yes	16	16	None
40	F	Not stated	18.36	2015-06-04	1899-12-31 19:15:00	MVC	EP	Non-Op	None	Yes	Yes	Yes	> 182 RBCs + 9 WBCs										Yes	No				No	CT cysto	1.67	Yes	Never obtained	Unknown	None
11	F	Non-Hispanic	24.26	2015-06-10	1899-12-31 18:30:00	MVC	EP	Op	None	Yes	Yes	Yes	> 182 RBCs	Urology	2015-06-11 12:39:00	18.15	Anterior bladder near dome	3	3	Vicryl	Running	No	Yes	No	3.16	Yes	4 doses of Ceftriaxone - 1 mg IV Q24	No	CT cysto	1.3	Yes	20	20	None
8	F	Non-Hispanic		2015-06-29	1899-12-31 10:15:00	MVC	IP	Op	Splenic laceration; large bowel laceration; fallopian tube laceration	Yes	Yes	Yes	Performed but lab states "exam performed on uncentrifiged urine with less than 1 mL of sample"	Urology	2018-10-29 16:10:00	5.92	Anterior bladder near dome	5	3	Vicryl	Running	No	Yes	No	2.57	Yes	4 days of Cefoxtin - 100 mg/kg Q8	No	CT cysto	3.77	Yes	Lost to F/U	18	None
16	M	White	20.2	2015-08-10	1899-12-31 19:53:00	MVC	EP	Non-Op	Splenic laceration; subarachnoid hemorrhage; pneumothorax	Yes	Yes	Yes	> 182 RBCs										Yes	No					CT cysto	3.05	Yes	15	Unknown	None	Note: US imaging used instead of fluorocystogram b/c pediatric patient.
66	F	White	21.83	2015-10-23	1899-12-31 12:45:00	MVC	EP	Non-Op	Subarachnoid hemorrhage, pulmonary contusion	Yes	Yes	Yes	> 182 RBC's										Yes	No					CT cysto	1.62	Yes	N/A	N/A	Patient passed away on 10/25
42	F	White	21.33	2016-01-22	1899-12-31 20:04:00	Pediastrian Struck by MV	IP	Op	None	Yes	Yes	Yes	> 182 RBC's	Urology	2016-01-22 21:09:00	1.08	Dome	4	2	Vicryl	Running	No	Yes	No	3.13	Yes	3 doses of IV Cefazolin - 2 mg IV	No	CT C/A/P with contrast	4.72	Unclear	24	24	None
42	M	Non-Hispanic	35.25	2016-02-05	1899-12-31 21:30:00	MVC	EP	Op	None	Yes	Yes	No		Urology	2016-02-07 07:47:00	34.28	Anterior bladder wall	1	2	Vicryl	Running	No	Yes	No	6.95	No		No	CT cysto	0.9	Yes	5	48	None
79	F	Non-Hispanic	22.7	2016-04-10	1899-12-31 06:30:00	Fall from standing	EP	Non-Op	None	No	Yes	No											Yes	No					Fluorocystogram	16.26	Yes	12	12	None
74	F	Non-Hispanic	35.3	2017-01-31	1899-12-31 22:20:00	MVC	EP	Op	None	Yes	Yes	Yes	> 182 RBCs	Urology	2017-02-01 09:02:00	10.8	Anterior bladder wall	1	3	Vicryl	Running	No	Yes	No	3.15	Yes	2 doses of IV Cefazolin - 2 mg IV	No	CT cysto	1.48	Yes	14	14	None
																																		Patient passed away during surgery
30	F	Non-Hispanic	23.9	2017-05-03	1899-12-31 17:00:00	MVC	IP	Op	None	Yes	Yes	Yes	> 182 RBCs	Urology	2017-05-03 21:24:00	4.4	Dome	6	3	Vicryl + PDS	Running	No	Yes	15 Fr round JP	3.23	Yes	2 doses of IV Cefazolin - 2 mg IV	Yes	CT cysto	1.35	Yes	16	16	None
47	F	Non-Hispanic	22.76	2017-05-29	1899-12-31 18:45:00	ATV	EP	Non-Op	None	Yes	Yes	Yes	> 182 RBCs + > 182 WBCs										Yes	No					CT cysto	1.78	Yes	21	21	None
11	M	Non-Hispanic	16.62	2017-09-09	1899-12-31 14:05:00	GSW	IP	Op	Small bowel puncture x8, rectal injury, prostatic urethral injury	No	Yes	No		Urology	2017-09-09 14:52:00	0.78	Posterior wall of bladder	1	2	Vicryl + Monocryl	Running	No	Yes	16 Fr SPT	6.7	Yes	28 doses of IV Cefoxitin - 1g Q6	Yes	CT abdo/pelvis with contrast	0.75	No	39	45 (SPT), 39 (urethral)	None
45	F	Non-Hispanic	22.13	2017-10-27	1899-12-31 23:35:00	MVC	EP	Op	No	Yes	Yes	Yes	> 182 RBCs + > 182 WBCs	Urology	11/17/2017 14:01	504	Anterior bladder near bladder neck	1	2	Vicryl	Both	No	Yes	10 Fr round blake drain	2.97	No		Yes	Fluorocystogram	12.7	Yes	40	33	E faecalis UTI on 12/15 (POD 28)
Done
No bladder injury
Information not in epic b/c I'm assuming too long ago? Mid-2008
